# Supplementary material for: Effects of alumina priming on the electrical properties of ZnO nanostructures derived from vapor-phase infiltration into self-assembled block copolymer thin films
Source: Royal Society of Chemistry journal article supplement (doi:10.1039/d4ma00346b), 2024-01-01
Supplement: d4ma00346b1.pdf [file d4ma00346b1.pdf]

## Supporting information

### **Effects of alumina priming on electrical properties of ZnO nanostructures derived from vapor-phase infiltration into self-assembled block copolymer thin films<sup>†</sup>**

Won-Il Lee<sup>1</sup>, Ashwanth Subramanian<sup>1</sup>, Kim Kisslinger<sup>2</sup>, Nikhil Tiwale<sup>2,\*</sup>, Chang-Yong Nam<sup>1,2,\*</sup>

<sup>1</sup>Department of Materials Science and Chemical Engineering, Stony Brook University, Stony Brook, New York 11794, USA

<sup>2</sup>Center for Functional Nanomaterials, Brookhaven National Laboratory, Upton, New York 11973, USA

\*Corresponding authors: [ntiwale@bnl.gov](mailto:ntiwale@bnl.gov), [cynam@bnl.gov](mailto:cynam@bnl.gov)

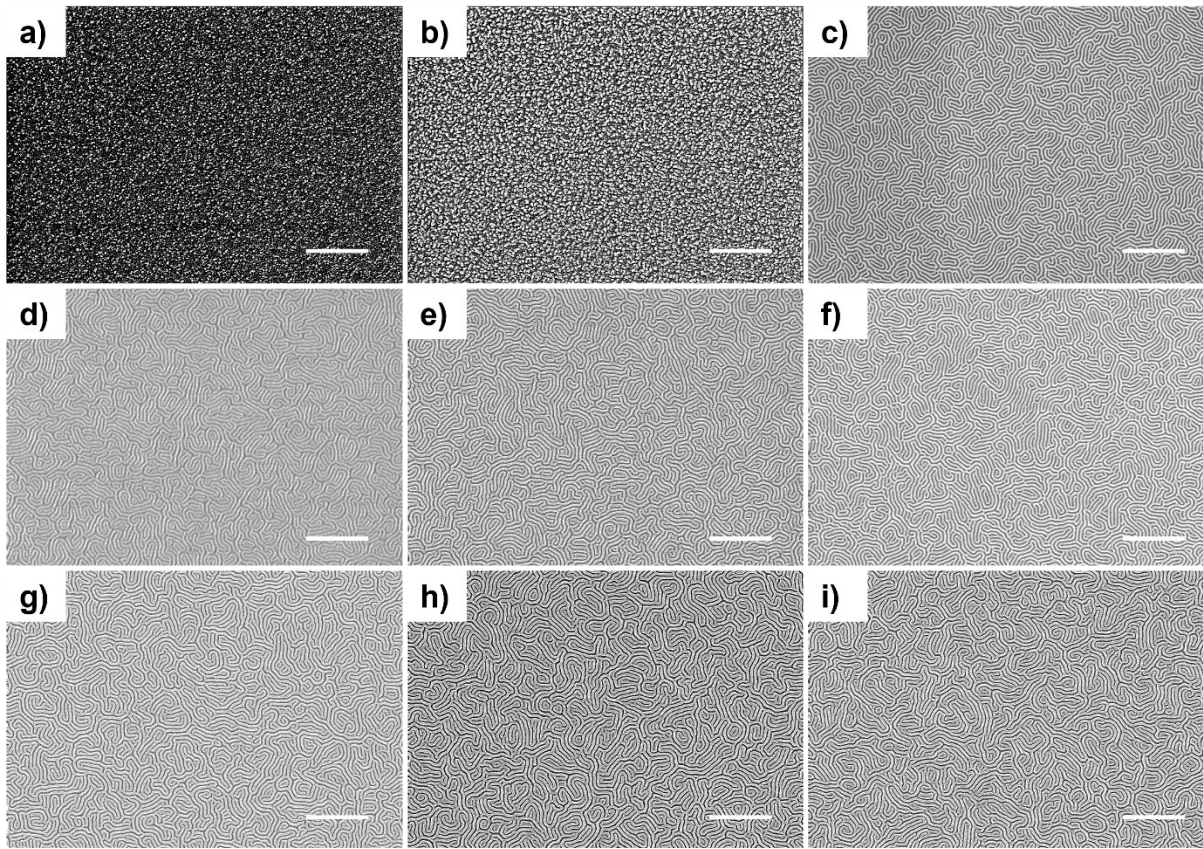

Fig. S1. Top-view SEM micrographs of AZO fingerprint patterns synthesized by VPI with different TMA exposure times, (a) 0 s, (b) 10 s, (c) 25 s, (d) 50 s, (e) 75 s, (f) 100 s, (g) 200 s, (h) 400 s, and (i) 800 s. All scale bars denote 1  $\mu\text{m}$ .

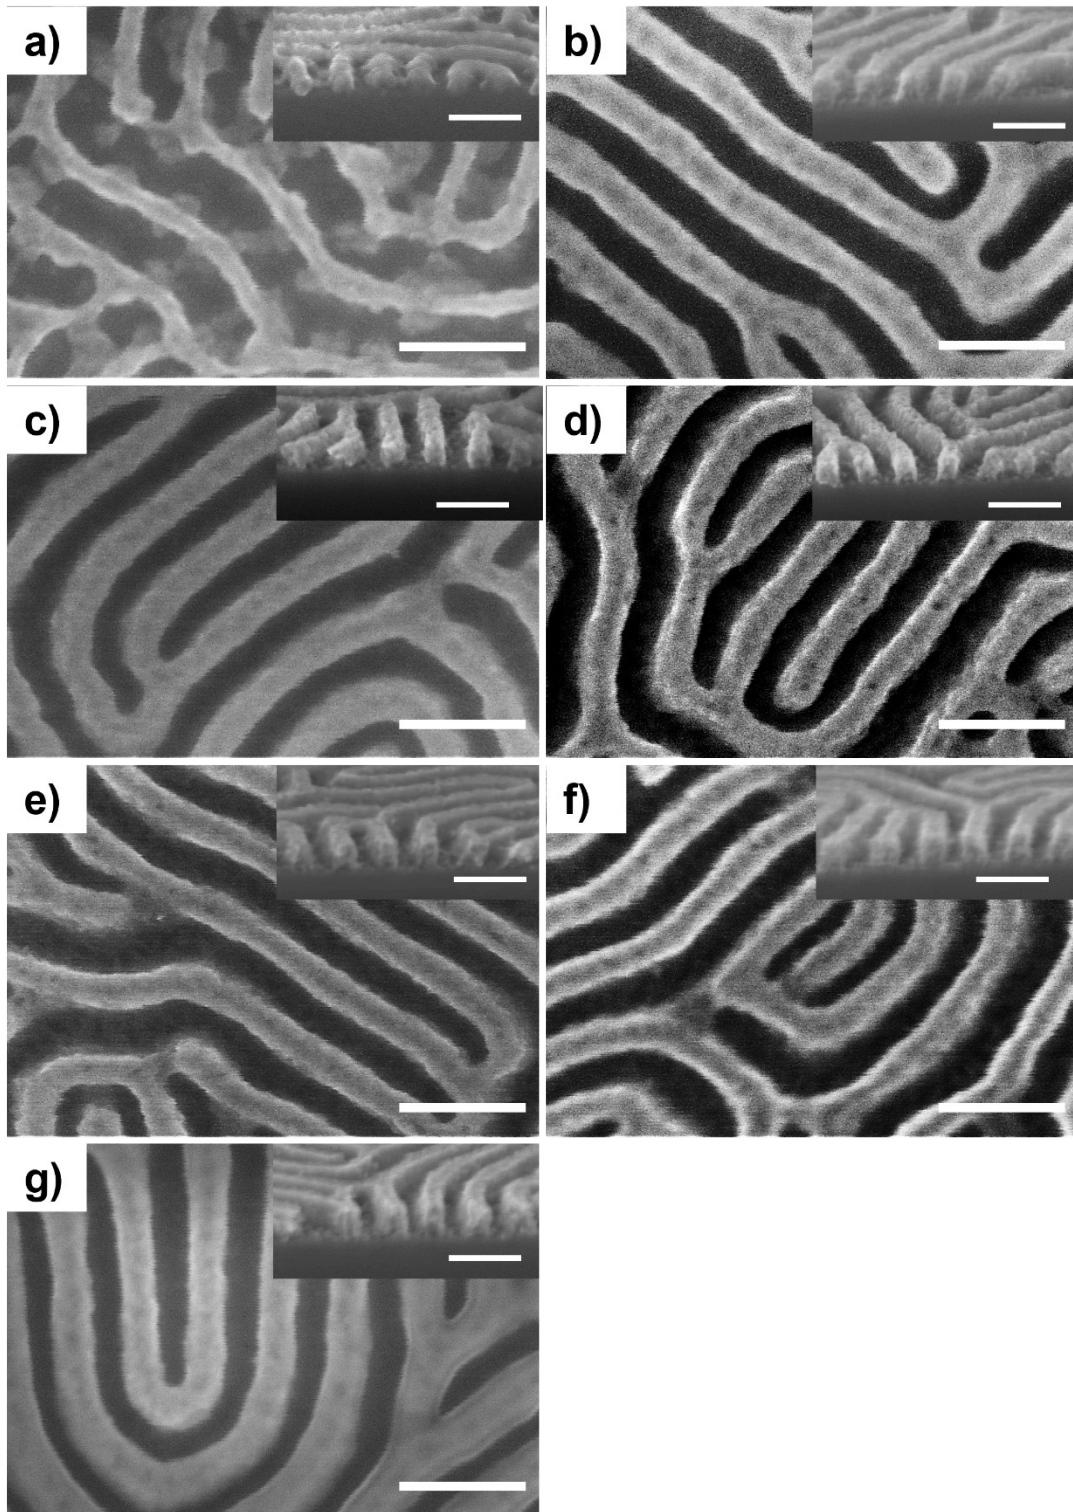

Fig. S2. Top-view of high magnification SEM micrographs of AZO fingerprint patterns synthesized by VPI with different TMA exposure time, (a) 25 s, (b) 50 s, (c) 75 s, (d) 100 s, (e) 200 s, (f) 400 s, and (g) 800 s. Insets depict cross-sectional SEM micrographs. All scale bars denote 100 nm.

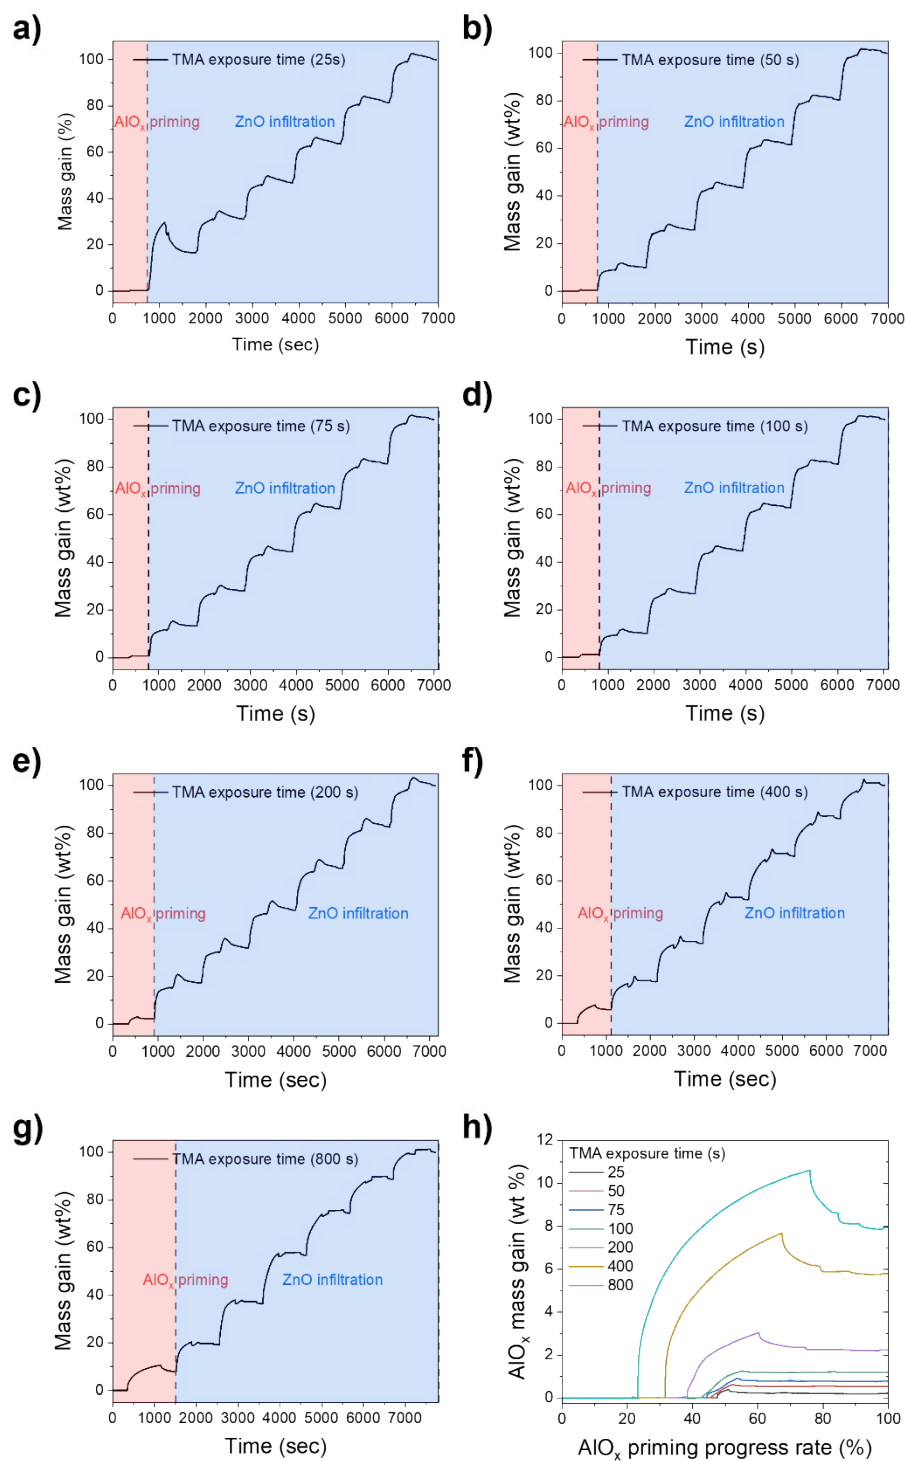

Fig. S3. Mass gain profile using in situ QCM during alumina primed zinc oxide VPI into PS-*b*-PMMA for varying TMA exposure duration; a) 25 s, b) 50 s, c) 75 s, d) 100 s, e) 200 s, f) 400 s, g) 800 s, and h)  $\text{AlO}_x$  mass gain profiles during different  $\text{AlO}_x$  priming cycles.

Table S1. Element composition of AZO structures for different TMA exposure time estimated using energy dispersive X-ray spectroscopy (EDS) analysis.

| TMA exposure time (s) | Oxygen (at. %) | Silicon (at. %) | Aluminum (at. %) | Zinc (at. %) | Al/(Al+Zn) (%) | Zn/Al ratio |
|-----------------------|----------------|-----------------|------------------|--------------|----------------|-------------|
| 25                    | 8.92 ± 0.13    | 84.64 ± 0.16    | 0.21 ± 0.02      | 6.23 ± 0.07  | 3.30           | 29.29       |
| 50                    | 11.52 ± 0.09   | 79.09 ± 0.19    | 0.35 ± 0.02      | 9.03 ± 0.10  | 3.77           | 25.55       |
| 75                    | 13.33 ± 0.08   | 75.47 ± 0.14    | 0.52 ± 0.04      | 10.69 ± 0.10 | 4.64           | 20.55       |
| 100                   | 13.66 ± 0.21   | 73.87 ± 0.32    | 0.75 ± 0         | 11.71 ± 0.12 | 6.02           | 15.62       |
| 200                   | 14.28 ± 0.33   | 72.38 ± 0.49    | 1.23 ± 0.07      | 12.11 ± 0.13 | 9.22           | 9.84        |
| 400                   | 16.63 ± 0.71   | 68.80 ± 1.00    | 1.77 ± 0.07      | 12.80 ± 0.21 | 12.15          | 7.23        |
| 800                   | 14.61 ± 0.05   | 71.56 ± 0.11    | 1.87 ± 0.03      | 11.98 ± 0.13 | 13.48          | 6.42        |

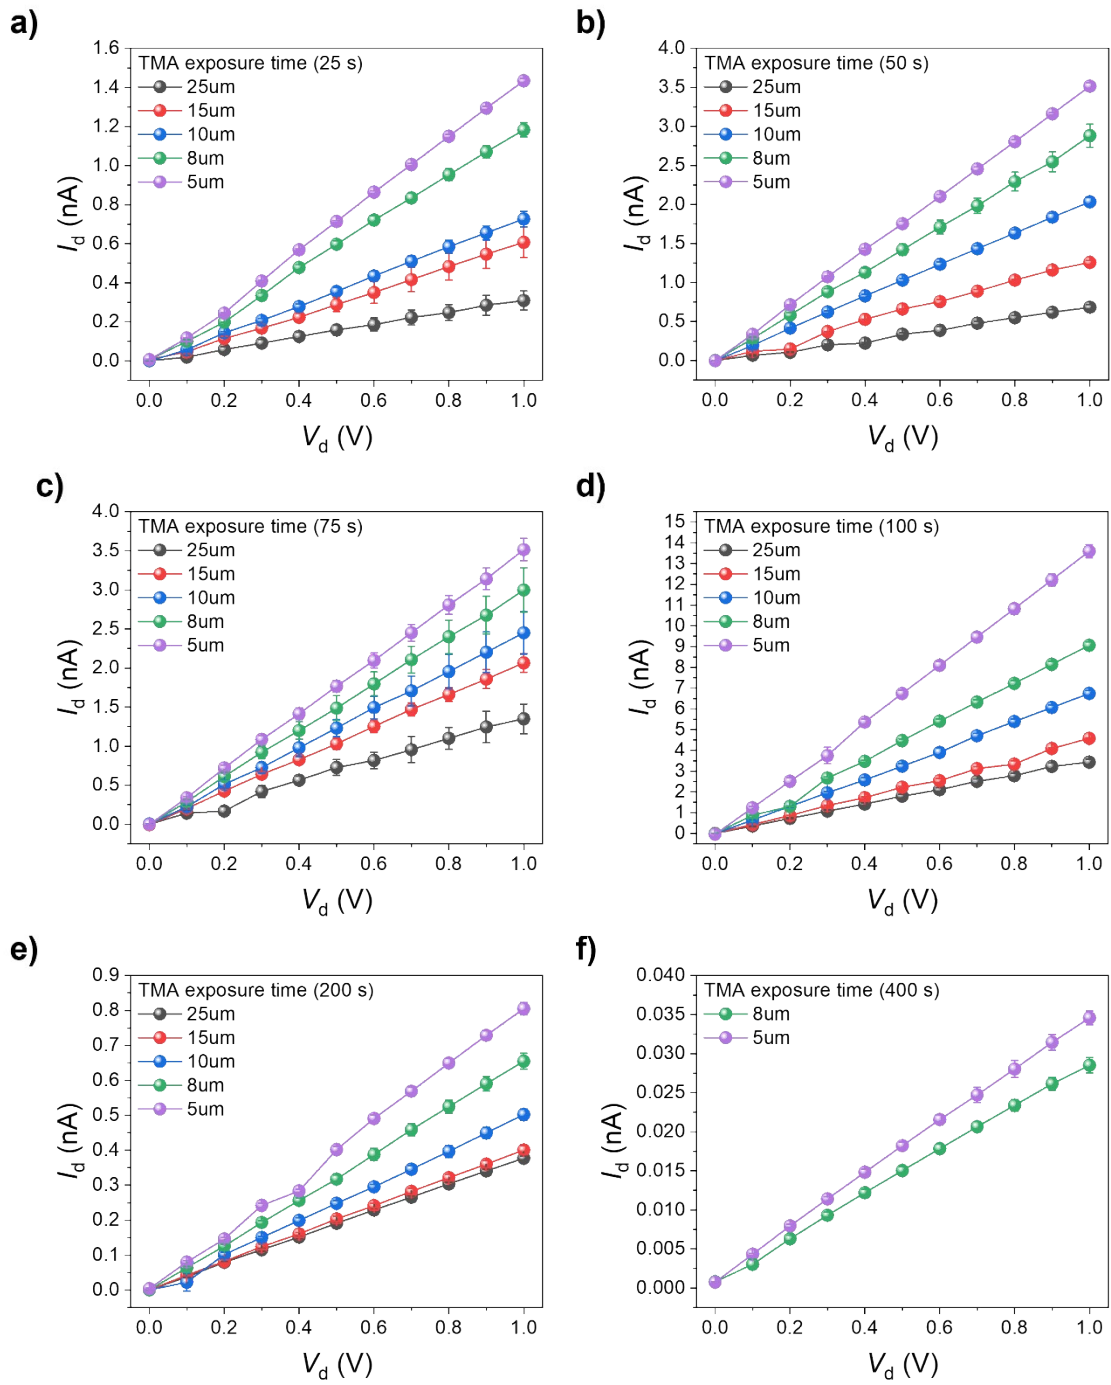

Fig. S4. I-V plots of TLM structure devices with various channel lengths (5, 8, 10, 15, 25  $\mu\text{m}$ ) of AZO nanopatterns with varying TMA exposure time; a) 25 s, b) 50 s, c) 75 s, d) 100 s, e) 200 s, and f) 400 s).

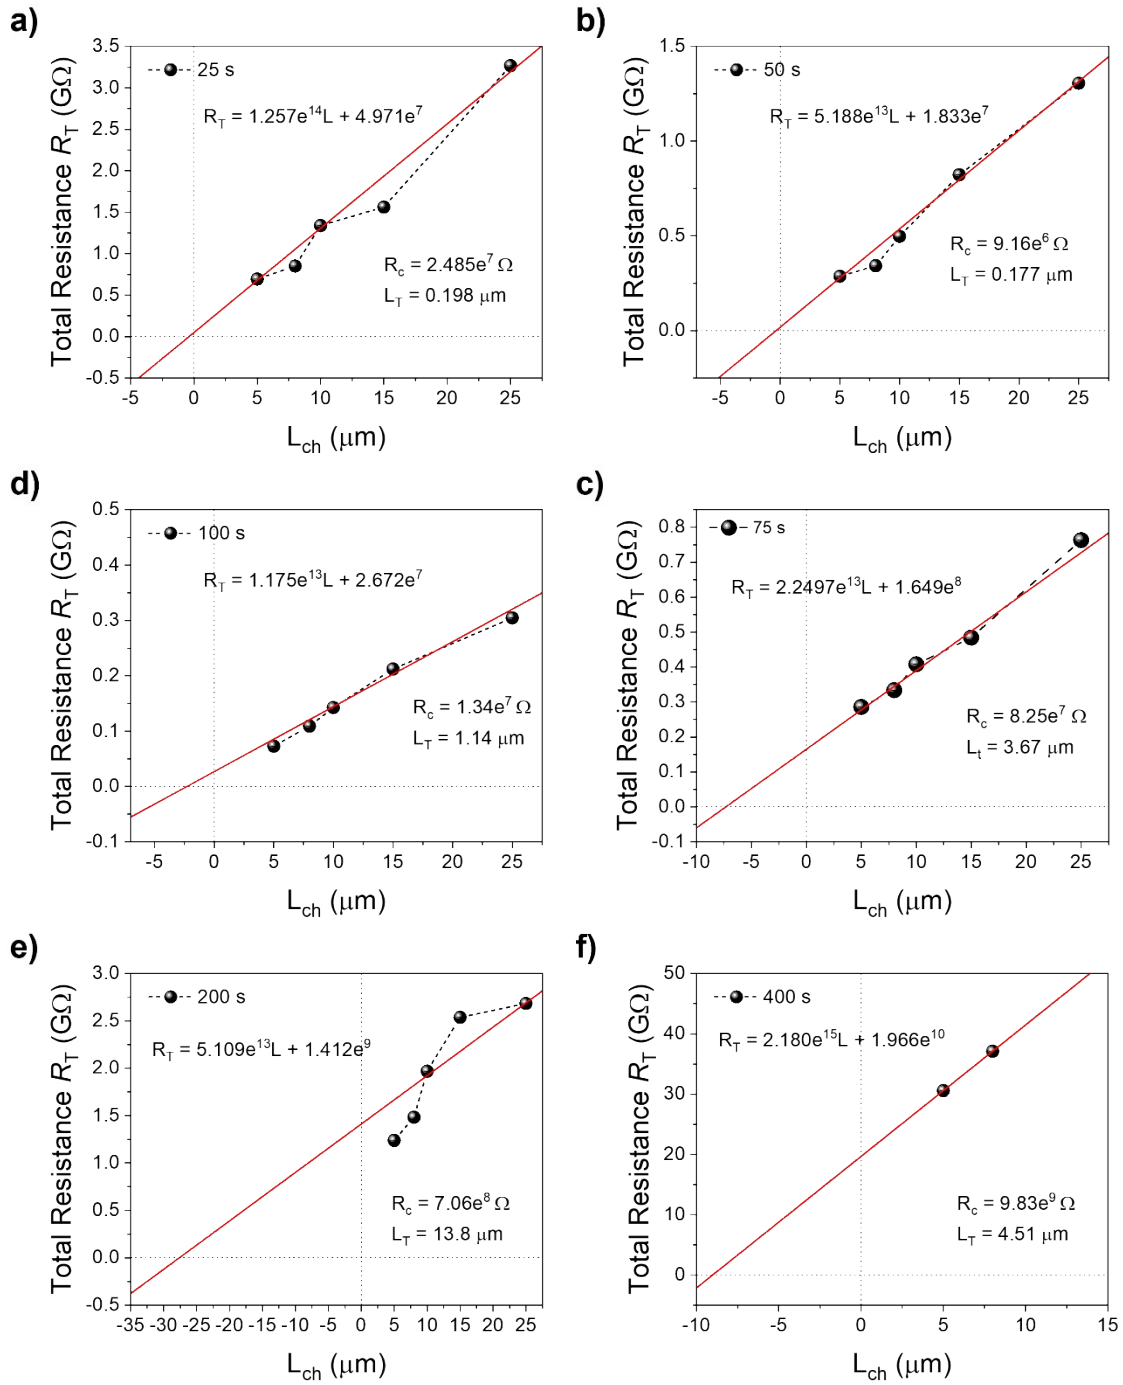

Fig. S5. Plots of total resistance ( $R_T$ ) vs. channel length of AZO nanostructure contacted TLM structures with different TMA exposure time; a) 25 s, b) 50 s, c) 75 s, d) 100 s, e) 200 s, and f) 400 s).

Table S2. Summary of reported resistivity of AZO materials according to structure.

| AZO structure              | Resistivity ( $\Omega \cdot \text{cm}$ ) | Al contents (%) | Optimal Al doping content (%) | Reference |
|----------------------------|------------------------------------------|-----------------|-------------------------------|-----------|
| Thin film (200 nm)         | $1.36 - 20 \times 10^{-3}$               | 1.67 – 10       | 5                             | 1         |
| Thin film (100 nm)         | $8 - 12 \times 10^{-3}$                  | 0 – 12          | 4.2                           | 2         |
| Thin film (90 nm)          | $0.6 - 10 \times 10^{-3}$                | 1.2 – 5.19      | 3.41                          | 3         |
| Thin film (50 nm)          | $0.75 - 1.6 \times 10^3$                 | 1 – 9           | 5                             | 4         |
| Nanoparticle (57 – 106 nm) | 4 – 6.66                                 | 0 – 6           | 6                             | 5         |
| Nanoparticle (12 – 34 nm)  | $1 - 50 \times 10^7$                     | 0 – 6           | 4                             | 6         |

References –

1. Z. Starowicz, A. Zięba, J. Ostapko, M. Wlazło, G. Kołodziej, M. J. Szczerba, G. Putynkowski and R. P. Socha, *Materials Science and Engineering: B*, 2023, **292**, 116405.
2. E. Shkondin, O. Takayama, M. A. Panah, P. Liu, P. V. Larsen, M. D. Mar, F. Jensen and A. Lavrinenko, *Optical Materials Express*, 2017, **7**, 1606-1627.
3. Y. Li, R. Yao, H. Wang, X. Wu, J. Wu, X. Wu and W. Qin, *ACS applied materials & interfaces*, 2017, **9**, 11711-11720.
4. N. Van Toan, T. T. K. Tuoi, N. Inomata, M. Toda and T. Ono, *Scientific reports*, 2021, **11**, 1204.
5. S. Jantrasee, P. Moontragoon and S. Pinitsoontorn, *Journal of Semiconductors*, 2016, **37**, 092002.
6. Y. Zhang, Y. Yang, J. Zhao, R. Tan, W. Wang, P. Cui and W. Song, *Journal of Materials Science*, 2011, **46**, 774-780.



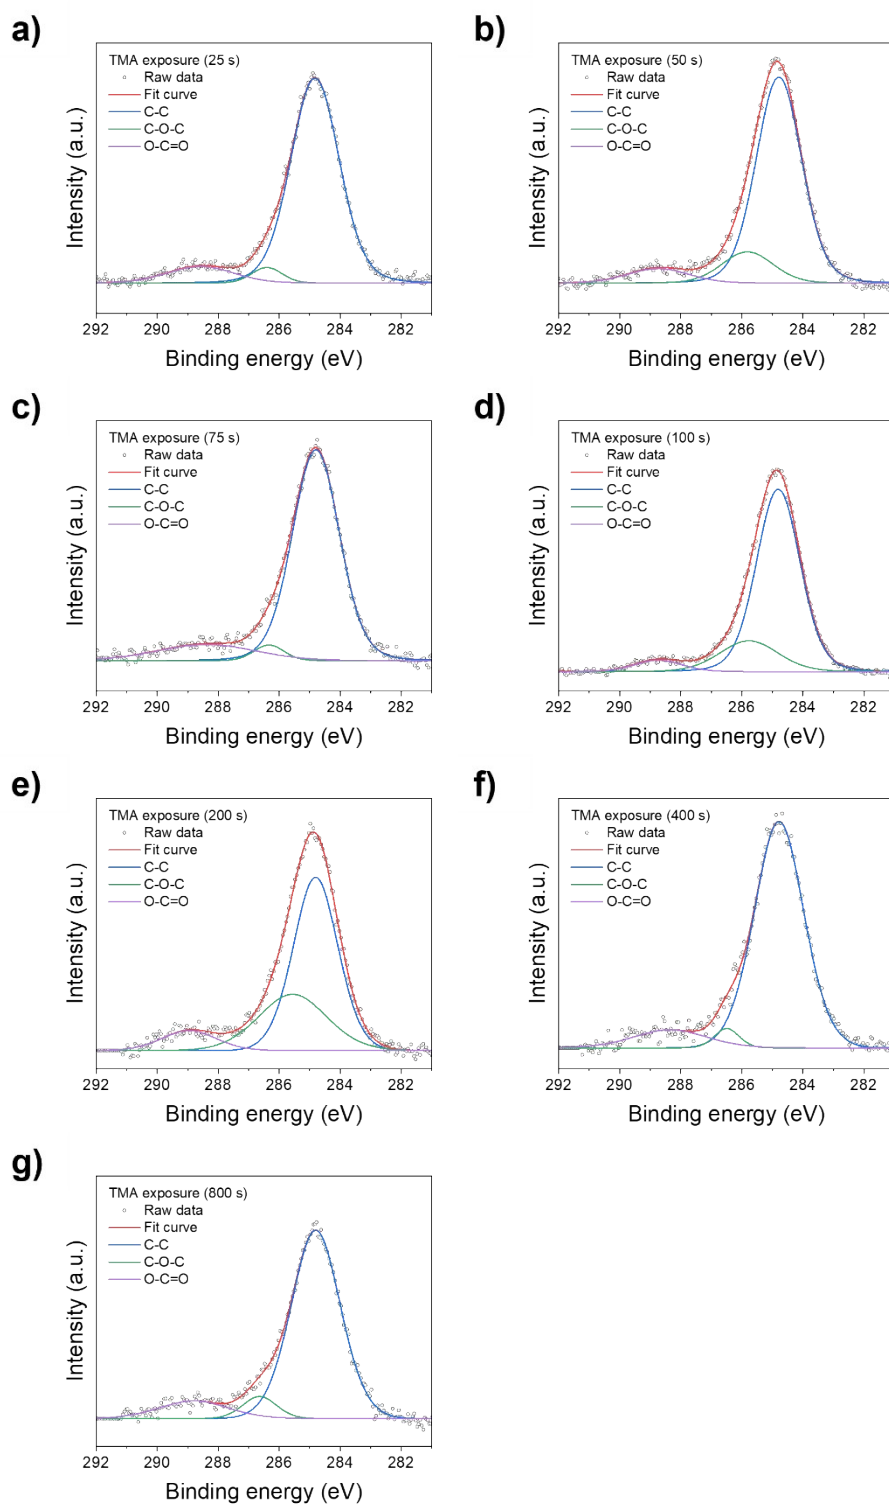

Fig. S6. High resolution XPS spectra of C 1s for AZO nanostructure with different TMA exposure time; a) 25 s, b) 50 s, c) 75 s, d) 100 s, e) 200 s, f) 400 s, and g) 800 s.

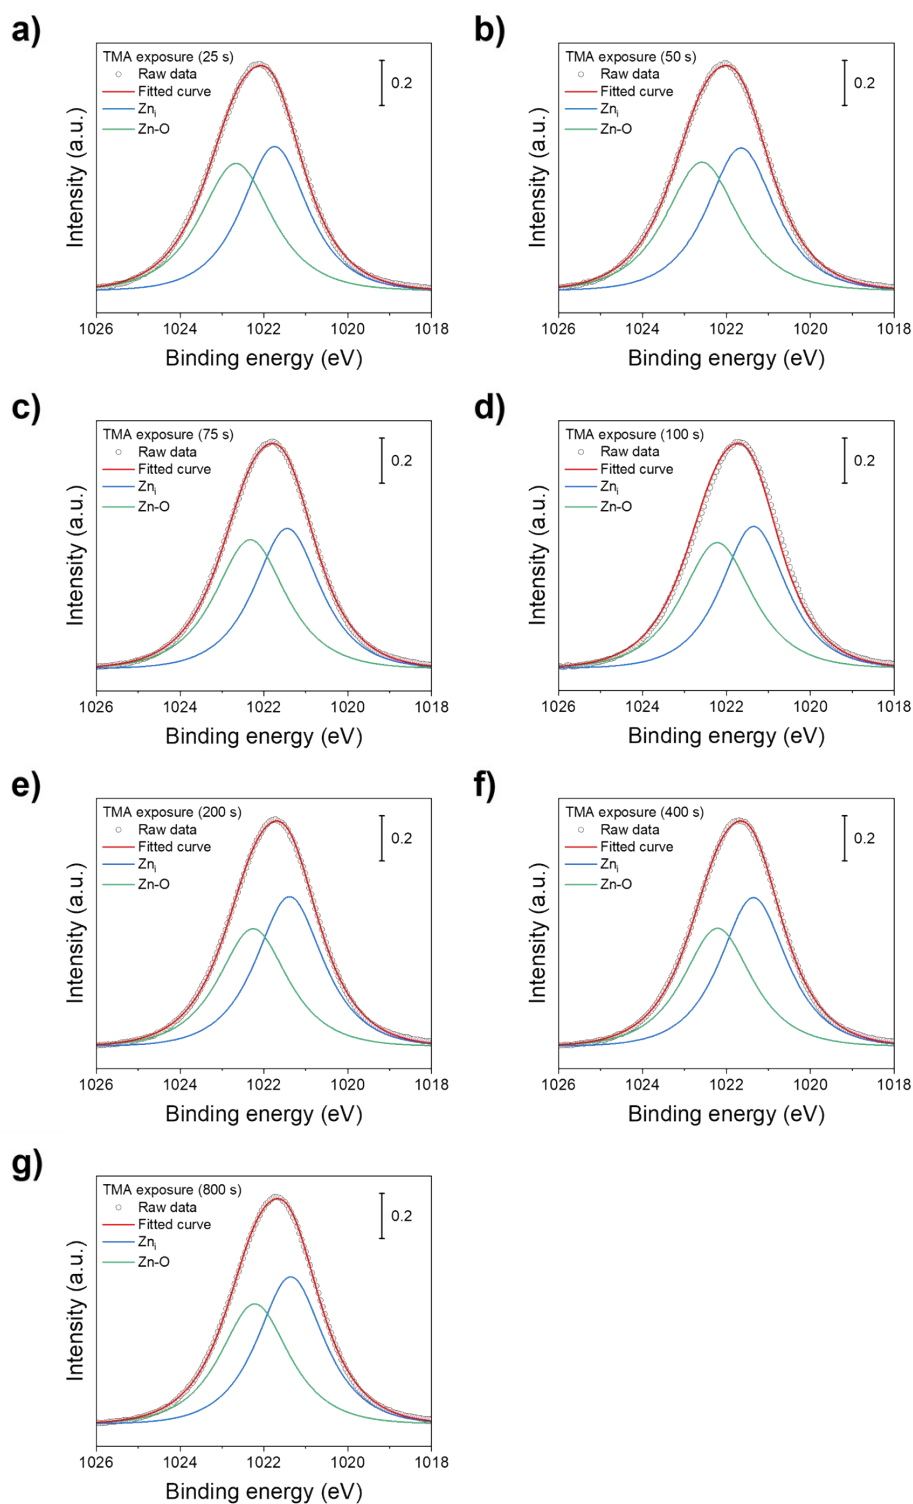

Fig. S7. High resolution XPS spectra of Zn 2p for AZO nanostructure with different TMA exposure time; a) 25 s, b) 50 s, c) 75 s, d) 100 s, e) 200 s, f) 400 s, and g) 800 s.

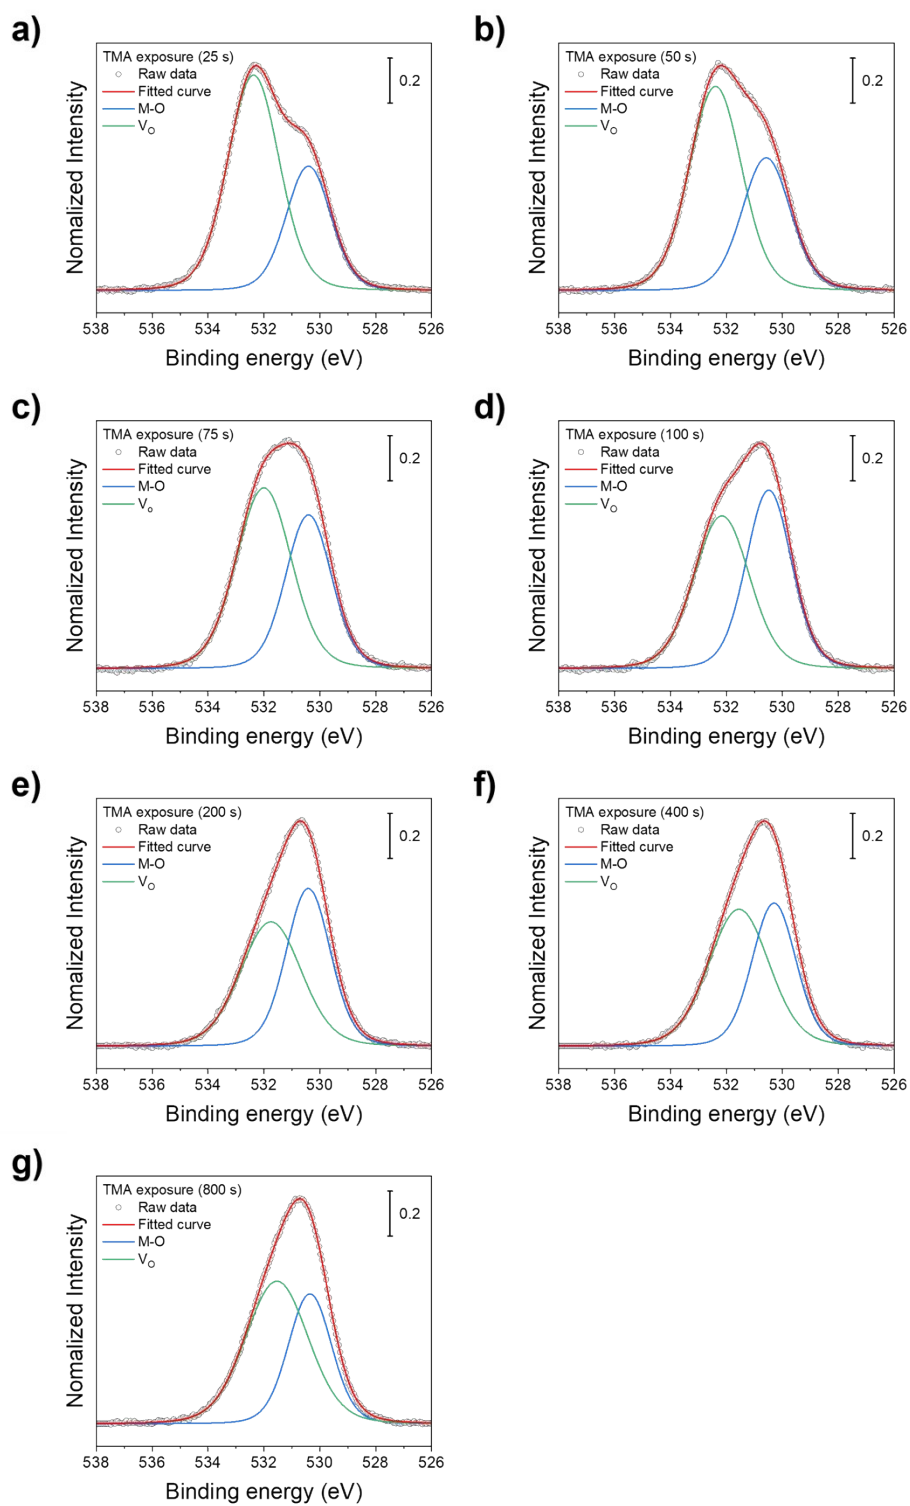

Fig. S8. High resolution XPS spectra of O 1s for AZO nanostructure with different TMA exposure time; a) 25 s, b) 50 s, c) 75 s, d) 100 s, e) 200 s, f) 400 s, and g) 800 s.

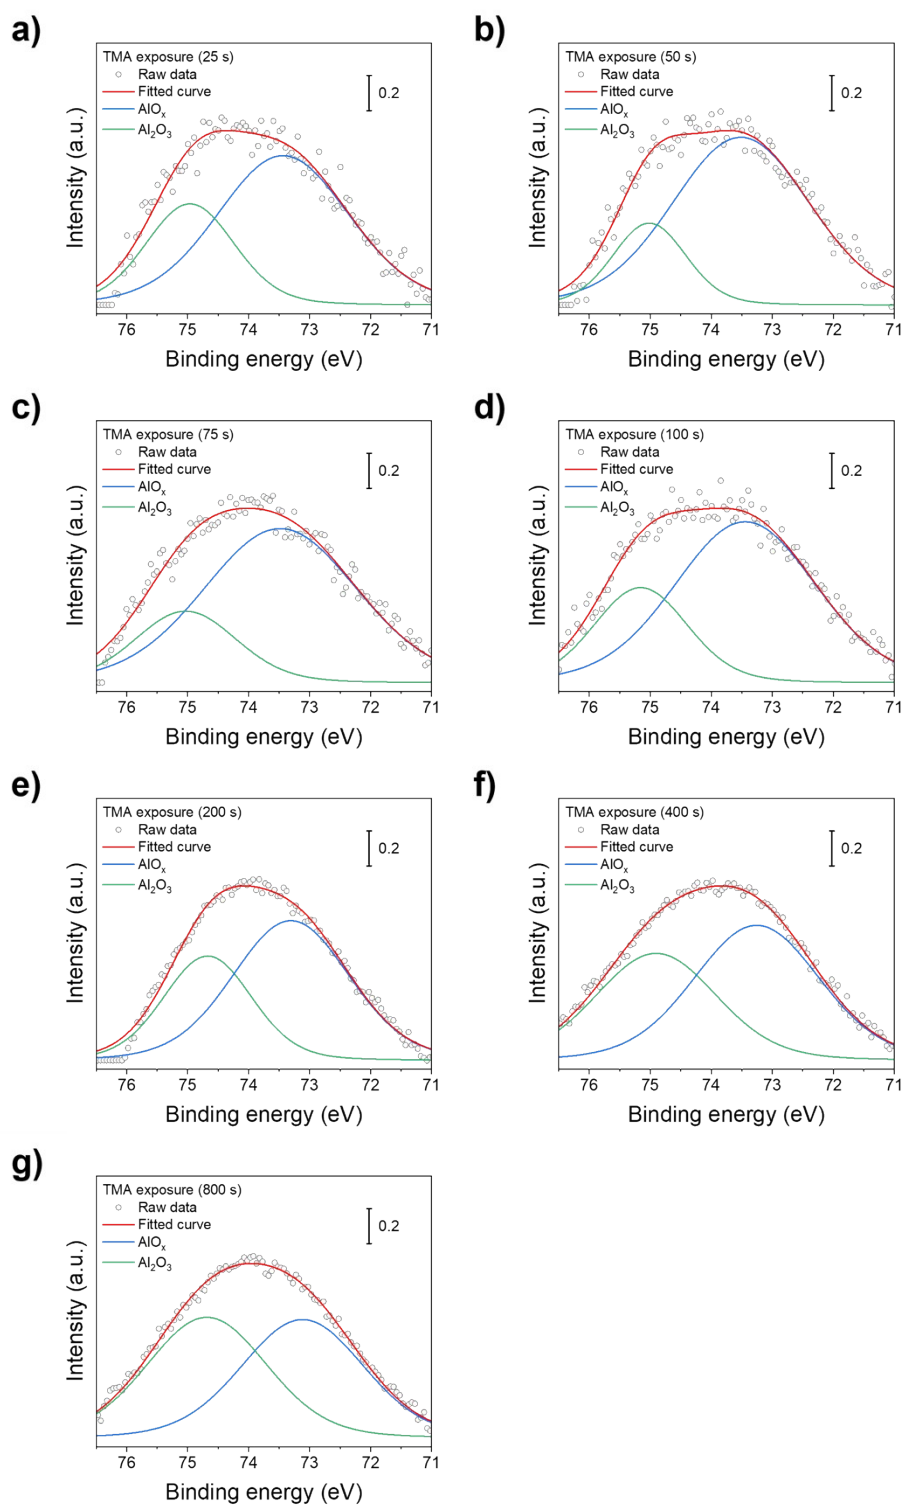

Fig. S9. High resolution XPS spectra of Al 2p for AZO nanostructure with different TMA exposure time; a) 25 s, b) 50 s, c) 75 s, d) 100 s, e) 200 s, f) 400 s, and g) 800 s.
